# Supplementary material
Source: publisher site journal article supplement (https://www.dovepress.com/get_supplementary_file.php?f=451320.docx)

Supplementary figure legend:

Supplement figure 1. Patients inclusion flowchart


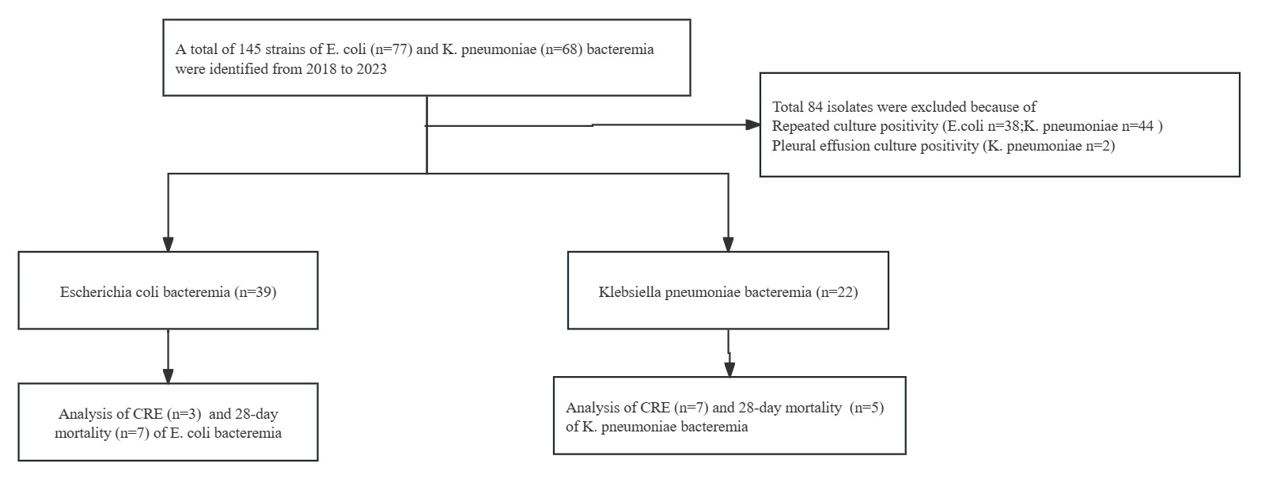

Supplement: Supplementary file 1 [file get_supplementary_file.php]
